# Supplementary material for: The Spread of SARS-CoV-2 Variant Omicron with a Doubling Time of 2.0–3.3 Days Can Be Explained by Immune Evasion
Source: MDPI journal article supplement (doi:10.3390/v14020294), 2022-01-30
Supplement: s1 [file s1]

|                                                                                                                                                                                                                                                                                                                                                                                                                                                                                                                                                                                                                                                                                                                                                                                                                                                                                                                                                                                                                                                                                                                                                                                                                                                                                                                                                                                                                                                                                                                                                                                                                                                                                                                                                                                                                                                                                                                                                                                                                                                                                                                                                                                                                                                                                                                                                                                                                                                                                                                                                                                                                                                                                                                                                                                                                                                                  |                                                           |                                                                                        |                                                                                                                                             |                                                                                                                                                                                                                                                                                                                                                                                                                                                                                                                                                                                                                                                                              |
|------------------------------------------------------------------------------------------------------------------------------------------------------------------------------------------------------------------------------------------------------------------------------------------------------------------------------------------------------------------------------------------------------------------------------------------------------------------------------------------------------------------------------------------------------------------------------------------------------------------------------------------------------------------------------------------------------------------------------------------------------------------------------------------------------------------------------------------------------------------------------------------------------------------------------------------------------------------------------------------------------------------------------------------------------------------------------------------------------------------------------------------------------------------------------------------------------------------------------------------------------------------------------------------------------------------------------------------------------------------------------------------------------------------------------------------------------------------------------------------------------------------------------------------------------------------------------------------------------------------------------------------------------------------------------------------------------------------------------------------------------------------------------------------------------------------------------------------------------------------------------------------------------------------------------------------------------------------------------------------------------------------------------------------------------------------------------------------------------------------------------------------------------------------------------------------------------------------------------------------------------------------------------------------------------------------------------------------------------------------------------------------------------------------------------------------------------------------------------------------------------------------------------------------------------------------------------------------------------------------------------------------------------------------------------------------------------------------------------------------------------------------------------------------------------------------------------------------------------------------|-----------------------------------------------------------|----------------------------------------------------------------------------------------|---------------------------------------------------------------------------------------------------------------------------------------------|------------------------------------------------------------------------------------------------------------------------------------------------------------------------------------------------------------------------------------------------------------------------------------------------------------------------------------------------------------------------------------------------------------------------------------------------------------------------------------------------------------------------------------------------------------------------------------------------------------------------------------------------------------------------------|
| EPI_ISL_6261993                                                                                                                                                                                                                                                                                                                                                                                                                                                                                                                                                                                                                                                                                                                                                                                                                                                                                                                                                                                                                                                                                                                                                                                                                                                                                                                                                                                                                                                                                                                                                                                                                                                                                                                                                                                                                                                                                                                                                                                                                                                                                                                                                                                                                                                                                                                                                                                                                                                                                                                                                                                                                                                                                                                                                                                                                                                  | ZARV, Department Medical Virology, University of Pretoria | ZARV, Department Medical Virology, University of Pretoria                              | Adriano Mendes; Amy Strydom; Katja Koeppel; Lia Rotherham and Marietjie Venter                                                              |                                                                                                                                                                                                                                                                                                                                                                                                                                                                                                                                                                                                                                                                              |
| EPI_ISL_6261983, EPI_ISL_6261987, EPI_ISL_6261989, EPI_ISL_6261996                                                                                                                                                                                                                                                                                                                                                                                                                                                                                                                                                                                                                                                                                                                                                                                                                                                                                                                                                                                                                                                                                                                                                                                                                                                                                                                                                                                                                                                                                                                                                                                                                                                                                                                                                                                                                                                                                                                                                                                                                                                                                                                                                                                                                                                                                                                                                                                                                                                                                                                                                                                                                                                                                                                                                                                               | ZARV, Department Medical Virology, University of Pretoria | ZARV, Department Medical Virology, University of Pretoria                              | Adriano Mendes; Amy Strydom; Katja Koeppel; Lia Rotherham and Marietjie Venter                                                              |                                                                                                                                                                                                                                                                                                                                                                                                                                                                                                                                                                                                                                                                              |
| EPI_ISL_4474416, EPI_ISL_4474417, EPI_ISL_4474418, EPI_ISL_4474419, EPI_ISL_4474420, EPI_ISL_4474421, EPI_ISL_4474422, EPI_ISL_4474423, EPI_ISL_4474424, EPI_ISL_4474425, EPI_ISL_4474426, EPI_ISL_4474427, EPI_ISL_4474428, EPI_ISL_4474429, EPI_ISL_4474430, EPI_ISL_4474431, EPI_ISL_4474432                                                                                                                                                                                                                                                                                                                                                                                                                                                                                                                                                                                                                                                                                                                                                                                                                                                                                                                                                                                                                                                                                                                                                                                                                                                                                                                                                                                                                                                                                                                                                                                                                                                                                                                                                                                                                                                                                                                                                                                                                                                                                                                                                                                                                                                                                                                                                                                                                                                                                                                                                                  | see above                                                 | ZARV/NHLS, Department Medical Virology, University of Pretoria                         | CERI, Centre for Epidemic Response and Innovation                                                                                           |                                                                                                                                                                                                                                                                                                                                                                                                                                                                                                                                                                                                                                                                              |
| EPI_ISL_5098761, EPI_ISL_5098766, EPI_ISL_5098771, EPI_ISL_5098774, EPI_ISL_5098782, EPI_ISL_5098787, EPI_ISL_5098801, EPI_ISL_5098860, EPI_ISL_5098870, EPI_ISL_5098876, EPI_ISL_5098882, EPI_ISL_5098912, EPI_ISL_5098921, EPI_ISL_5098949, EPI_ISL_5098984, EPI_ISL_5098990, EPI_ISL_5099007, EPI_ISL_5099083, EPI_ISL_6795833, EPI_ISL_6795834, EPI_ISL_6795835, EPI_ISL_6795836, EPI_ISL_6795837, EPI_ISL_6795838, EPI_ISL_6795839, EPI_ISL_6795840, EPI_ISL_6795841, EPI_ISL_6795842, EPI_ISL_6795843, EPI_ISL_6795844, EPI_ISL_6795845, EPI_ISL_6795846, EPI_ISL_6795847, EPI_ISL_6795848, EPI_ISL_6795849, EPI_ISL_6795850, EPI_ISL_6825389, EPI_ISL_6825390, EPI_ISL_6825391, EPI_ISL_6825392, EPI_ISL_6825393, EPI_ISL_6825394, EPI_ISL_6825395, EPI_ISL_6825396, EPI_ISL_6825397, EPI_ISL_6825398, EPI_ISL_7015171, EPI_ISL_7015172, EPI_ISL_7015173, EPI_ISL_7015174, EPI_ISL_7015175, EPI_ISL_7015176, EPI_ISL_7015177, EPI_ISL_7015178, EPI_ISL_7015179, EPI_ISL_7015180, EPI_ISL_7015181, EPI_ISL_7015182, EPI_ISL_7015183, EPI_ISL_7015184, EPI_ISL_7015185, EPI_ISL_7015186, EPI_ISL_7015187, EPI_ISL_7015188, EPI_ISL_7015189, EPI_ISL_7015190, EPI_ISL_7015191, EPI_ISL_7015192, EPI_ISL_7015193, EPI_ISL_7015194, EPI_ISL_7015195, EPI_ISL_7015196, EPI_ISL_7015197, EPI_ISL_7015198, EPI_ISL_7015199, EPI_ISL_7015200, EPI_ISL_7015201, EPI_ISL_7015202, EPI_ISL_7015203, EPI_ISL_7015204, EPI_ISL_7015205, EPI_ISL_7015206, EPI_ISL_7015207, EPI_ISL_7015208, EPI_ISL_8128432, EPI_ISL_8128433, EPI_ISL_8128434, EPI_ISL_8128435, EPI_ISL_8128436, EPI_ISL_8128437, EPI_ISL_8128438, EPI_ISL_8128439, EPI_ISL_8128440, EPI_ISL_8128441, EPI_ISL_8128442, EPI_ISL_8128443, EPI_ISL_8128444, EPI_ISL_8128445, EPI_ISL_8128446, EPI_ISL_8128447, EPI_ISL_8128448, EPI_ISL_8128449, EPI_ISL_8128450, EPI_ISL_8128451, EPI_ISL_8128452, EPI_ISL_8128453, EPI_ISL_8128454, EPI_ISL_8128455, EPI_ISL_8128456, EPI_ISL_8128457, EPI_ISL_8128458, EPI_ISL_8128459, EPI_ISL_8128460, EPI_ISL_8128461, EPI_ISL_8128462, EPI_ISL_8128463, EPI_ISL_8128464, EPI_ISL_8128465, EPI_ISL_8128466, EPI_ISL_8128467, EPI_ISL_8128468, EPI_ISL_8128469, EPI_ISL_8128470, EPI_ISL_8128471, EPI_ISL_8128472, EPI_ISL_8128473, EPI_ISL_8128474, EPI_ISL_8128475, EPI_ISL_8128476, EPI_ISL_8128477, EPI_ISL_8128478, EPI_ISL_8128479, EPI_ISL_8128480, EPI_ISL_8128481, EPI_ISL_8128482, EPI_ISL_8128483, EPI_ISL_8128484, EPI_ISL_8128485, EPI_ISL_8128486, EPI_ISL_8128487, EPI_ISL_8128488, EPI_ISL_8128489, EPI_ISL_8128490, EPI_ISL_8128491, EPI_ISL_8128492, EPI_ISL_8128493, EPI_ISL_8128494, EPI_ISL_8128495, EPI_ISL_8128496, EPI_ISL_8128497, EPI_ISL_8128498, EPI_ISL_8128499, EPI_ISL_8128500, EPI_ISL_8128501, EPI_ISL_8128502, EPI_ISL_8128503, EPI_ISL_8128504                                                                                      | see above                                                 | ZARV/NHLS, Department Medical Virology, University of Pretoria                         | CERI, Centre for Epidemic Response and Innovation, Stellenbosch University and KRISP, KZN Research Innovation and Sequencing Platform, UKZN | Adriano Mendes; Amoaka D; Amy Strydom; Arisha Maharaj; Bester P; Bhiman J; Engelbrecht S; Everatt J; Giandhari J; Giandhari Jennifer; Goedhals D; Hardie D; Hsiao M; Iranzadeh A; Lessells R; Makatini Z; Maponga T; Mdlalose N; Micheala Davids; Milisana K; Moir M; NGS-SA (Scheepers C; Naidoo Y; Naidoo Yeshnee; Nyaga M) Giandhari J; Oluwakemi M; Pillay S; Pillay Sureshnee; Preiser W; Ramphal U; Ramphal Y; San JE; San James; Sim Mayaphi and Marietjie Venter; Tegally H; Tegally Houriiyah; Tshiabula D; Tshiabula Derek; Upasana Ramphal; Venter M; Wilkinson E; Wilkinson Eduan; Williamson C; Yajna Ramphal; de Oliveira T; de Oliveira Tulio; von Gottberg A |
| EPI_ISL_2727239, EPI_ISL_2727240, EPI_ISL_2727241, EPI_ISL_2727242, EPI_ISL_2727243, EPI_ISL_2727244, EPI_ISL_2727245, EPI_ISL_2727246, EPI_ISL_2727247, EPI_ISL_2727248, EPI_ISL_2727249, EPI_ISL_2727250, EPI_ISL_2727251, EPI_ISL_2727252, EPI_ISL_2727253, EPI_ISL_2727254, EPI_ISL_2727255, EPI_ISL_2727256, EPI_ISL_2727257, EPI_ISL_2727258, EPI_ISL_2727259, EPI_ISL_2727260, EPI_ISL_2727261, EPI_ISL_2727262, EPI_ISL_2727263, EPI_ISL_2727264, EPI_ISL_2727265, EPI_ISL_2727266, EPI_ISL_2727267, EPI_ISL_2727268, EPI_ISL_2727269, EPI_ISL_2727270, EPI_ISL_2727271, EPI_ISL_2727272, EPI_ISL_2727273, EPI_ISL_2727274, EPI_ISL_2727275, EPI_ISL_2727276, EPI_ISL_2727277, EPI_ISL_2727278, EPI_ISL_2727279, EPI_ISL_2727280, EPI_ISL_2727281, EPI_ISL_2727282, EPI_ISL_2727283, EPI_ISL_2727284, EPI_ISL_2727285, EPI_ISL_2727286, EPI_ISL_2727287, EPI_ISL_2727288, EPI_ISL_2727289, EPI_ISL_2727290, EPI_ISL_4572282, EPI_ISL_4572283, EPI_ISL_4572284, EPI_ISL_4572285, EPI_ISL_4572286, EPI_ISL_4572287, EPI_ISL_4572288, EPI_ISL_4572289, EPI_ISL_4572290, EPI_ISL_4572291, EPI_ISL_4572292, EPI_ISL_4572293, EPI_ISL_4572294, EPI_ISL_4572295, EPI_ISL_4572319, EPI_ISL_4572322, EPI_ISL_4572323, EPI_ISL_4572324, EPI_ISL_4572329, EPI_ISL_4572331, EPI_ISL_4572333, EPI_ISL_4572334, EPI_ISL_4572338, EPI_ISL_4572339, EPI_ISL_4572342, EPI_ISL_4572343, EPI_ISL_4572353, EPI_ISL_4572356, EPI_ISL_4572357, EPI_ISL_4572358, EPI_ISL_4572360, EPI_ISL_4572361, EPI_ISL_4572366, EPI_ISL_4572367, EPI_ISL_4572373, EPI_ISL_4572374, EPI_ISL_4572378, EPI_ISL_4572379, EPI_ISL_4572387, EPI_ISL_4572388, EPI_ISL_4572389, EPI_ISL_4572390, EPI_ISL_4575029, EPI_ISL_4575030, EPI_ISL_4575031, EPI_ISL_4575032, EPI_ISL_4575033, EPI_ISL_4575034, EPI_ISL_4575035, EPI_ISL_4575036, EPI_ISL_4575037, EPI_ISL_4575038, EPI_ISL_4575039, EPI_ISL_4575040, EPI_ISL_4575041, EPI_ISL_4575042, EPI_ISL_4575043, EPI_ISL_4575044, EPI_ISL_4575045, EPI_ISL_4575046, EPI_ISL_4575047, EPI_ISL_4575048, EPI_ISL_4575049, EPI_ISL_4575050, EPI_ISL_4575051, EPI_ISL_4575052, EPI_ISL_4575053, EPI_ISL_4575054, EPI_ISL_4575060, EPI_ISL_4575070, EPI_ISL_4575071, EPI_ISL_4575079, EPI_ISL_4575080, EPI_ISL_4575081, EPI_ISL_4575082, EPI_ISL_4575084, EPI_ISL_4575085, EPI_ISL_4575100, EPI_ISL_4575102, EPI_ISL_4575107, EPI_ISL_4575119, EPI_ISL_4575120, EPI_ISL_4575121, EPI_ISL_4575127, EPI_ISL_4575128, EPI_ISL_4575129, EPI_ISL_4575130, EPI_ISL_4575133, EPI_ISL_4575141, EPI_ISL_4575142, EPI_ISL_4575150, EPI_ISL_4575151, EPI_ISL_4575155, EPI_ISL_4575082, EPI_ISL_4575088, EPI_ISL_4575089, EPI_ISL_4575098, EPI_ISL_4575166, EPI_ISL_4575167, EPI_ISL_4575169, EPI_ISL_4575170, EPI_ISL_4575171, EPI_ISL_4575183, EPI_ISL_4575184, EPI_ISL_4575185, EPI_ISL_4575189, EPI_ISL_4575190, EPI_ISL_4575191, EPI_ISL_4575200, EPI_ISL_4575203 | see above                                                 | ZARV/NHLS, Department Medical Virology, University of Pretoria                         | KRISP, KZN Research Innovation and Sequencing Platform                                                                                      | Adriano Mendes; Amy Strydom; Emmanuel SJ; Giandhari J; Giandhari Jennifer; Lessells R; Micheala Davids; Naidoo Y; Naidoo Yeshnee; Pillay S; Pillay Sureshnee; Ramphal U; San James; Sim Mayaphi and Marietjie Venter; Tegally H; Tegally Houriiyah; Tshiabula Derek; Wilkinson E; Wilkinson Eduan; Yajna Ramphal; de Oliveira T; de Oliveira Tulio                                                                                                                                                                                                                                                                                                                           |
| EPI_ISL_2727328, EPI_ISL_2727329, EPI_ISL_2727330, EPI_ISL_2727331, EPI_ISL_2727332, EPI_ISL_2727333, EPI_ISL_2727334, EPI_ISL_2727335, EPI_ISL_2727336, EPI_ISL_2727337, EPI_ISL_2727338, EPI_ISL_2727339, EPI_ISL_2727340, EPI_ISL_2727341, EPI_ISL_2727342, EPI_ISL_2727343, EPI_ISL_2727344, EPI_ISL_2727345, EPI_ISL_2727346, EPI_ISL_2727347, EPI_ISL_2727348, EPI_ISL_2727349, EPI_ISL_2727350, EPI_ISL_2727351, EPI_ISL_2727352, EPI_ISL_2727353, EPI_ISL_2727354, EPI_ISL_2727355, EPI_ISL_2727356, EPI_ISL_2727357, EPI_ISL_2727358, EPI_ISL_2727359, EPI_ISL_2727360, EPI_ISL_2727361, EPI_ISL_2727362, EPI_ISL_2727363, EPI_ISL_2727364, EPI_ISL_2727365, EPI_ISL_2727366, EPI_ISL_2727367, EPI_ISL_2727368, EPI_ISL_2727369, EPI_ISL_2727370, EPI_ISL_2727371, EPI_ISL_2727372, EPI_ISL_2727373, EPI_ISL_2727374, EPI_ISL_2727375, EPI_ISL_2727376, EPI_ISL_2727377, EPI_ISL_2727378, EPI_ISL_2727379, EPI_ISL_2899741, EPI_ISL_2899742, EPI_ISL_2899743, EPI_ISL_2899744, EPI_ISL_2899745, EPI_ISL_2899746, EPI_ISL_2899747, EPI_ISL_2899748, EPI_ISL_2899749, EPI_ISL_2899750, EPI_ISL_2899751, EPI_ISL_2899752, EPI_ISL_2899753, EPI_ISL_2899754, EPI_ISL_2899755, EPI_ISL_2899757, EPI_ISL_2899757, EPI_ISL_2955421, EPI_ISL_2955422, EPI_ISL_2955423, EPI_ISL_2955424, EPI_ISL_2955425, EPI_ISL_2955426, EPI_ISL_2955427, EPI_ISL_2955428, EPI_ISL_2955429, EPI_ISL_2955430, EPI_ISL_2955431, EPI_ISL_2955432, EPI_ISL_2955433, EPI_ISL_2955434, EPI_ISL_2955435, EPI_ISL_2955436, EPI_ISL_2955437, EPI_ISL_2955438, EPI_ISL_2955440, EPI_ISL_2955441, EPI_ISL_2955442, EPI_ISL_2955443, EPI_ISL_2955444, EPI_ISL_2955445, EPI_ISL_2955446, EPI_ISL_2955447, EPI_ISL_2955448, EPI_ISL_2955449, EPI_ISL_2955450, EPI_ISL_2955451, EPI_ISL_2955452, EPI_ISL_4121618, EPI_ISL_4121678, EPI_ISL_4121684                                                                                                                                                                                                                                                                                                                                                                                                                                                                                                                                                                                                                                                                                                                                                                                                                                                                                                                                                                                                                                            | see above                                                 | ZARV/NHLS, Department Medical Virology, University of Pretoria                         | KRISP, KZN Research Innovation and Sequencing Platform                                                                                      | Adriano Mendes; Amy Strydom; Emmanuel SJ; Giandhari J; Lessells R; Micheala Davids; Naidoo Y; Pillay S; Ramphal U; Sim Mayaphi and Marietjie Venter; Tegally H; Wilkinson E; de Oliveira T                                                                                                                                                                                                                                                                                                                                                                                                                                                                                   |
| EPI_ISL_5510403                                                                                                                                                                                                                                                                                                                                                                                                                                                                                                                                                                                                                                                                                                                                                                                                                                                                                                                                                                                                                                                                                                                                                                                                                                                                                                                                                                                                                                                                                                                                                                                                                                                                                                                                                                                                                                                                                                                                                                                                                                                                                                                                                                                                                                                                                                                                                                                                                                                                                                                                                                                                                                                                                                                                                                                                                                                  | ZONE 3 CLINIC                                             | National Institute for Communicable Diseases of the National Health Laboratory Service | Amoaka DG; Bhiman JN; Everatt J; Ismail A; Mahlangu B; Mnguni A; Mohale T; Ntuli N; Scheepers C                                             |                                                                                                                                                                                                                                                                                                                                                                                                                                                                                                                                                                                                                                                                              |
